# Supplementary material for: Early Impairment of Paracrine and Phenotypic Features in Resident Cardiac Mesenchymal Stromal Cells after Thoracic Radiotherapy
Source: MDPI journal article supplement (doi:10.3390/ijms25052873), 2024-03-01

## Supplemental Material

Article

# Early impairment of paracrine and phenotypic features in resident cardiac mesenchymal stromal cells after thoracic radiotherapy

Vittorio Picchio <sup>1†</sup>, Roberto Gaetani <sup>2†</sup>, Francesca Pagano <sup>3</sup>, Yuriy Derevyanchuk <sup>2</sup>, Olivia Pagliarosi <sup>2</sup>, Erica Floris <sup>4</sup>, Claudia Cozzolino <sup>4</sup>, Giacomo Bernava <sup>5</sup>, Antonella Bordin <sup>4</sup>, Filipe Rocha <sup>6</sup>, Ana RS Pereira <sup>6</sup>, Augusto Ministro <sup>6</sup>, Ana T Pinto <sup>6</sup>, Elena De Falco <sup>4,7</sup>, Gianpaolo Serino <sup>8</sup>, Diana Massai <sup>8</sup>, Radia Tamarat <sup>9</sup>, Maurizio Pesce <sup>5</sup>, Susana Constantino Rosa Santos<sup>6</sup>, Elisa Messina, <sup>2§\*</sup>, Isotta Chimenti <sup>4,7 §,\*</sup>

<sup>1</sup> Department of Angio Cardio Neurology, IRCCS Neuromed, Pozzilli, Italy.

<sup>2</sup> Department of Molecular Medicine, Sapienza University, Rome, Italy.

<sup>3</sup> Institute of Biochemistry and Cell Biology, National Council of Research (IBBC-CNR), Monterotondo (RM), Italy.

<sup>4</sup> Department of Medical Surgical Sciences and Biotechnologies, Sapienza University, Latina, Italy.

<sup>5</sup> Centro Cardiologico Monzino, IRCCS, Milano, Italy.

<sup>6</sup> Centro Cardiovascular da Universidade de Lisboa (CCUL@RISE), Lisbon School of Medicine of the Universidade de Lisboa; Lisbon, Portugal.

<sup>7</sup> Mediterranea Cardiocentro, Napoli, Italy.

<sup>8</sup> Department of Mechanical and Aerospace Engineering, Politecnico di Torino, Turin, Italy; Interuniversity Center for the Promotion of the 3Rs Principles in Teaching and Research, Italy.

<sup>9</sup> Institut de Radioprotection et de Sûreté Nucléaire (IRSN), Fontenay-aux-Roses, France.

\* Correspondence: Phone: +3907731757234. E-mail: elisa.messina@uniroma1.it; isotta.chimenti@uniroma1.it

<sup>†</sup> Equal contribution.

<sup>§</sup> Equal contribution.

## Content of this appendix:

**Supplemental Tables** **page 2**

**Supplemental Figures** **page 10**

**Supplemental Table S1.** Flow cytometry data (Mean +/- SEM) plotted in figure 3.

|                | <b>6 Weeks</b>     |                    |
|----------------|--------------------|--------------------|
|                | <b>CD90+/DDR2-</b> | <b>CD31+/CD45-</b> |
| <b>SHAM</b>    | 39,1 +/- 5,1       | 2,2 +/- 0,4        |
| <b>0.04 Gy</b> | 46,9 +/- 7,7       | 2,0 +/- 0,4        |
| <b>0.3 Gy</b>  | 35,5 +/- 11,2      | 1,6 +/- 0,4        |
| <b>1.2 Gy</b>  | 21,4 +/- 5,9       | 1,2 +/- 0,3        |
|                | <b>12 Weeks</b>    |                    |
|                | <b>CD90+/DDR2-</b> | <b>CD31+/CD45-</b> |
| <b>SHAM</b>    | 49,4 +/- 7,5       | 0,6 +/- 0,2        |
| <b>0.04 Gy</b> | 45,4 +/- 7,7       | 0,4 +/- 0,0        |
| <b>0.3 Gy</b>  | 49,6 +/- 6,3       | 0,5 +/- 0,0        |
| <b>1.2 Gy</b>  | 52,6 +/- 12,9      | 0,2 +/- 0,0        |

## Supplemental Table S2. Gene Ontology (GO) with statistical analysis of modulated genes

from RNA-seq data. GO-terms that are statistically significant from the gene ontology analysis on the gProfiler database, on the comparison between cells from the sham and 1.2 Gy at the 12-week follow-up.

| GO Molecular Function | Description                        | Count in network | Adjusted P-value       | Intersection                                                                                   |
|-----------------------|------------------------------------|------------------|------------------------|------------------------------------------------------------------------------------------------|
| GO:0005198            | structural molecule activity       | 5 of 801         | $1,2 \times 10^{-2}$   | COL11A1, AC105662.1, RPS3A, RPL19, RPS23                                                       |
| GO:0003735            | structural constituent of ribosome | 2 of 4           | $3,04 \times 10^{-2}$  | AC105662.1, RPS3A, RPL19, RPS23                                                                |
| GO Cellular Component | Description                        | Count in network | Adjusted P-value       | Intersection                                                                                   |
| GO:0042788            | polysomal ribosome                 | 2 of 23          | $7,743 \times 10^{-3}$ | RPL19, RPS23                                                                                   |
| GO:0005829            | cytosol                            | 8 of 3141        | $1.924 \times 10^{-2}$ | S100B, RBP1, AC105662.1, RPL19, GDA, STMN1, RPS23, SRGAP2                                      |
| GO:0005737            | cytoplasm                          | 13 of 8997       | $2.205 \times 10^{-2}$ | CREB3L1, S100B, RBP1, PFN1, AC105662.1, SLC25A5, RPL19, GDA, STMN1, RPS23, SRGAP2, FBNP1, SQOR |
| GO:0005840            | ribosome                           | 4 of 591         | $3.148 \times 10^{-2}$ | AC105662.1, RPS3A, RPL19, RPS23                                                                |
| GO:0005844            | polysome                           | 2 of 57          | $4.828 \times 10^{-2}$ | RPL19, RPS23                                                                                   |
| KEGG                  | Description                        | Count in network | Adjusted P-value       | Intersection                                                                                   |
| KEGG:03010            | Ribosome                           | 3 of 158         | $4.838 \times 10^{-3}$ | RPS3A, RPL19, RPS23                                                                            |
| REACTOME              | Description                        | Count in network | Adjusted P-value       | Intersection                                                                                   |
| R-RNO-927802          | Nonsense-Mediated Decay (NMD)      | 3 of 141         | $9.308 \times 10^{-3}$ | RPS3A, RPL19, RPS23                                                                            |
| R-RNO-72312           | rRNA processing                    | 3 of 201         | $2.655 \times 10^{-2}$ | RPS3A, RPL19, RPS23                                                                            |
| R-RNO-72766           | Translation                        | 3 of 244         | $4.688 \times 10^{-2}$ | RPS3A, RPL19, RPS23                                                                            |
| WIKIPATHWAY           | Description                        | Count in network | Adjusted P-value       | Intersection                                                                                   |
| WP30                  | Cytoplasmic Ribosomal Proteins     | 3 of 80          | $1.882 \times 10^{-4}$ | RPS3A, RPL19, RPS23                                                                            |
| WP590                 | Cardiovascular Signaling           | 2 of 36          | $2838 \times 10^{-3}$  | COL11A1, STMN1                                                                                 |

**Supplementary Table S3. Gene Ontology (GO) with statistical analysis of modulated genes from RNA-seq data.** Selected GO-terms from the gProfiler database that are statistically significant with time (6 versus 12 weeks of follow-up) in the comparison between cells of the 1.2 Gy dose groups.

| <b>GO-ter</b>      | <b>Description</b>                               | <b>Count in network</b> | <b>Adjusted P-value</b>         | <b>Intersection</b>                                                                                                                                                                                                                      |
|--------------------|--------------------------------------------------|-------------------------|---------------------------------|------------------------------------------------------------------------------------------------------------------------------------------------------------------------------------------------------------------------------------------|
| GO:0007179         | TGF- $\beta$ receptor signaling pathway          | 5 of 156                | 1.837 $\times$ 10 <sup>-3</sup> | ZMIZ1, CCL2, LOX, VASN, DAB2                                                                                                                                                                                                             |
| GO:0071560         | Cellular response to TGF- $\beta$ stimulus       | 5 of 206                | 3,578 $\times$ 10 <sup>-3</sup> | ZMIZ1, CCL2, LOX, VASN, DAB2                                                                                                                                                                                                             |
| GO:0071559         | Response to TGF- $\beta$                         | 5 of 209                | 3,655 $\times$ 10 <sup>-3</sup> | ZMIZ1, CCL2, LOX, VASN, DAB2                                                                                                                                                                                                             |
| GO:0071363         | Cellular response to growth factor stimulus      | 7 of 562                | 5,003 $\times$ 10 <sup>-3</sup> | ZMIZ1, CCL2, PDE8A, LOX, BCAR1, VASN, DAB2                                                                                                                                                                                               |
| GO:0071363         | Enzyme linked receptor protein signaling pathway | 8 of 798                | 4,362 $\times$ 10 <sup>-3</sup> | ZMIZ1, CCL2, CDK4, LOX, BCAR1, VASN, ESM1, DAB2                                                                                                                                                                                          |
| GO:0070848         | Response to growth factor                        | 7 of 577                | 6,337 $\times$ 10 <sup>-3</sup> | ZMIZ1, CCL2, PDE8A, LOX, BCAR1, VASN, DAB2                                                                                                                                                                                               |
| <b>GO Term</b>     | <b>Description</b>                               | <b>Count in network</b> | <b>Adjusted P-value</b>         | <b>Intersection</b>                                                                                                                                                                                                                      |
| GO:0005737         | Cytoplasm                                        | 28 of 8997              | 9,348 $\times$ 10 <sup>-6</sup> | TUBA1A, SQOR, LIPA, MICAL3, RPL19, ZMIZ1, SERPINI1, CCL2, CDK4, FH, LOC108348287, ADM, FABP3, BCAR1, TOMM6, VASN, MCU, AABR07040892.1, DNAJC19, FNBP1, LIG4, LOC100363268, PPP2R3C, S100A4, SRGAP2, TSNAX, EMC2, DAB2                    |
| GO:0043229         | Intracellular organelle                          | 30 of 10611             | 2,486 $\times$ 10 <sup>-4</sup> | TUBA1A, SQOR, LIPA, MGLL, MICAL3, RPL19, ZMIZ1, SERPINI1, CCL2, CDK4, FH, LOC108348287, RGD1561590, BCAR1, TOMM6, VASN, MCM4, MCU, AABR07040892.1, DIDO1, DNAJC19, FNBP1, LIG4, LOC100363268, PPP2R3C, S100A4, SRGAP2, TSNAX, EMC2, DAB2 |
| GO:0043231         | Intracellular membrane-bounded organelle         | 26 of 9156              | 1,037 $\times$ 10 <sup>-3</sup> | TUBA1A, SQOR, LIPA, MGLL, MICAL3, RPL19, ZMIZ1, SERPINI1, CCL2, CDK4, FH, RGD1561590, TOMM6, VASN, MCM4, MCU, DIDO1, DNAJC19, LIG4, LOC100363268, PPP2R3C, S100A4, SRGAP2, TSNAX, EMC2, DAB2                                             |
| <b>KEGG</b>        | <b>Description</b>                               | <b>Count in network</b> | <b>Adjusted P-value</b>         | <b>Intersection</b>                                                                                                                                                                                                                      |
| KEGG: 04218        | Cellular senescence                              | 3 of 170                | 4,254 $\times$ 10 <sup>-2</sup> | RT1-A1, CDK4, MCU                                                                                                                                                                                                                        |
| <b>WIKIPATHWAY</b> | <b>Description</b>                               | <b>Count in network</b> | <b>Adjusted P-value</b>         | <b>Intersection</b>                                                                                                                                                                                                                      |
| WP: WP348          | G1 to S cell cycle control                       | 2 of 65                 | 4,648 $\times$ 10 <sup>-2</sup> | CDK4, MCM4                                                                                                                                                                                                                               |

**Supplemental Table S4.** Gene Ontology analysis of the top 15 up-regulated and top 15 down-regulated cytokines obtained from the STRING database, with strength >1, and involving at least 5 counts in the network.

| term ID<br>Biological<br>Process | term description                        | observed<br>count | strength | FDR      | matching proteins in the network                                                                                                                      |
|----------------------------------|-----------------------------------------|-------------------|----------|----------|-------------------------------------------------------------------------------------------------------------------------------------------------------|
| GO:0033993                       | Response to lipid                       | 18                | 1,04     | 5.46e-12 | PAI-1, Adiponectin, CXCL7, Cystatin C, CCL2, IGFBP-3, IL-6, IL-17A, Lipocalin-2, CD106, RBP4, CCL20, MMP-2, IGFBP-2, MMP-9, CD54, GM-CSF, Osteopontin |
| GO:0034097                       | Response to cytokine                    | 15                | 1,05     | 6.16e-10 | PAI-1, Adiponectin, CXCL7, CCL2, IL-6, IL-17A, Lipocalin-2, CD106, CCL20, MMP-2, MMP-9, CD54, GM-CSF, CD10, Osteopontin                               |
| GO:0071345                       | Cellular response to cytokine stimulus  | 14                | 1,08     | 1.21e-09 | PAI-1, CXCL7, CCL2, IL-6, IL-17A, Lipocalin-2, CD106, CCL20, MMP-2, MMP-9, CD54, GM-CSF, CD10, Osteopontin                                            |
| GO:0030334                       | Regulation of cell migration            | 14                | 1,02     | 6.42e-09 | Resistin, PAI-1, Adiponectin, FBLN3, CCL2, WISP-1, IGFBP-3, CCN3, MMP-3, CCL20, MMP-2, MMP-9, NT-3, CD54                                              |
| GO:0071396                       | Cellular response to lipid              | 13                | 1,16     | 1.09e-09 | PAI-1, CXCL7, CCL2, IGFBP-3, IL-6, IL-17A, Lipocalin-2, CCL20, MMP-2, MMP-9, CD54, GM-CSF, Osteopontin                                                |
| GO:1901652                       | Response to peptide                     | 12                | 1,15     | 7.63e-09 | Resistin, PAI-1, Adiponectin, CCL2, IGFBP-3, IL-6, CD106, RBP4, MMP-2, MMP-9, CD54, AHSG                                                              |
| GO:0031667                       | Response to nutrient levels             | 12                | 1,1      | 2.22e-08 | PAI-1, Adiponectin, Cystatin C, CCL2, IGFBP-3, IL-6, Lipocalin-2, CD106, IGFBP-2, MMP-9, CD54, Osteopontin                                            |
| GO:0009617                       | Response to bacterium                   | 12                | 1,01     | 1.99e-07 | PAI-1, Adiponectin, CXCL7, CCL2, IGFBP-3, IL-6, Lipocalin-2, CD106, CCL20, MMP-9, CD54, GM-CSF                                                        |
| GO:0032496                       | Response to lipopolysaccharide          | 11                | 1,27     | 4.80e-09 | PAI-1, CXCL7, CCL2, IGFBP-3, IL-6, Lipocalin-2, CD106, CCL20, MMP-9, CD54, GM-CSF                                                                     |
| GO:0007568                       | Aging                                   | 11                | 1,24     | 7.63e-09 | PAI-1, CCL2, IGFBP-3, IL-6, CD106, Clusterin, MMP-2, IGFBP-2, MMP-9, CD54, CD10                                                                       |
| GO:0042493                       | Response to drug                        | 11                | 1,12     | 9.35e-08 | PAI-1, Adiponectin, Cystatin C, CCL2, IGFBP-3, IL-6, Lipocalin-2, MMP-2, IGFBP-2, MMP-9, CD54                                                         |
| GO:0010035                       | Response to inorganic substance         | 11                | 1,02     | 6.54e-07 | PAI-1, Cystatin C, IL-6, Lipocalin-2, CD106, Clusterin, MMP-2, IGFBP-2, MMP-9, CD54, GM-CSF                                                           |
| GO:0006954                       | Inflammatory response                   | 10                | 1,11     | 5.63e-07 | CXCL7, CCL2, IL-6, IL-17A, CD106, CCL20, Clusterin, CD54, AHSG, Osteopontin                                                                           |
| GO:0030335                       | Positive regulation of cell migration   | 10                | 1,09     | 8.28e-07 | Resistin, PAI-1, CCL2, WISP-1, MMP-3, CCL20, MMP-2, MMP-9, NT-3, CD54                                                                                 |
| GO:0071347                       | Cellular response to interleukin-1      | 9                 | 1,71     | 1.79e-10 | PAI-1, CCL2, IL-6, IL-17A, Lipocalin-2, CCL20, MMP-2, MMP-9, CD54                                                                                     |
| GO:0071222                       | Cellular response to lipopolysaccharide | 9                 | 1,45     | 1.10e-08 | PAI-1, CXCL7, CCL2, IL-6, Lipocalin-2, CCL20, MMP-9, CD54, GM-CSF                                                                                     |
| GO:0032868                       | Response to insulin                     | 9                 | 1,36     | 4.95e-08 | Resistin, PAI-1, Adiponectin, CCL2, IGFBP-3, IL-6, RBP4, CD54, AHSG                                                                                   |
| GO:0001666                       | Response to hypoxia                     | 9                 | 1,21     | 5.78e-07 | PAI-1, Adiponectin, Cystatin C, CCL2, IGFBP-3, CD106, MMP-2, MMP-9, CD54                                                                              |
| GO:0048608                       | Reproductive structure development      | 9                 | 1,06     | 7.46e-06 | PAI-1, Cystatin C, CD106, RBP4, MMP-2, CD54, GM-CSF, CD10, AHSG                                                                                       |
| GO:0034612                       | Response to tumor necrosis factor       | 8                 | 1,41     | 1.88e-07 | Adiponectin, CCL2, IL-6, Lipocalin-2, CD106, CCL20, MMP-9, CD54                                                                                       |

|            |                                                      |    |      |          |                                                                                                                       |
|------------|------------------------------------------------------|----|------|----------|-----------------------------------------------------------------------------------------------------------------------|
| GO:0042593 | Glucose homeostasis                                  | 8  | 1,34 | 5.25e-07 | PAI-1, Adiponectin, CCL2, WISP-1, IL-6, CD106, RBP4, CD54                                                             |
| GO:0048545 | Response to steroid hormone                          | 8  | 1,09 | 2.07e-05 | PAI-1, Adiponectin, CCL2, IL-6, IL-17A, IGFBP-2, CD54, Osteopontin                                                    |
| GO:0001819 | Positive regulation of cytokine production           | 8  | 1,09 | 2.17e-05 | PAI-1, Adiponectin, CCL2, IL-6, IL-17A, CCL20, Clusterin, GM-CSF                                                      |
| GO:0009314 | Response to radiation                                | 8  | 1,03 | 4.94e-05 | CCL2, CD106, RBP4, Clusterin, MMP-2, MMP-9, CD54, CD10                                                                |
| GO:0048660 | Regulation of smooth muscle cell proliferation       | 7  | 1,45 | 9.94e-07 | Resistin, Adiponectin, WISP-1, IGFBP-3, IL-6, MMP-2, MMP-9                                                            |
| GO:0008284 | Positive regulation of cell population proliferation | 15 | 1    | 2.28e-09 | Resistin, PAI-1, FBLN3, Cystatin C, CCL2, WISP-1, IL-6, CD106, Clusterin, MMP-2, IGFBP-2, MMP-9, NT-3, GM-CSF, FLT3LG |
| GO:0071356 | Cellular response to tumor necrosis factor           | 7  | 1,41 | 1.60e-06 | CCL2, IL-6, Lipocalin-2, CD106, CCL20, MMP-9, CD54                                                                    |
| GO:0032355 | Response to estradiol                                | 7  | 1,33 | 4.29e-06 | Cystatin C, CCL2, IGFBP-3, IL-6, MMP-2, IGFBP-2, MMP-9                                                                |
| GO:0050900 | Leukocyte migration                                  | 7  | 1,31 | 5.74e-06 | CXCL7, CCL2, IL-17A, CD106, CCL20, CD54, Osteopontin                                                                  |
| GO:0007565 | Female pregnancy                                     | 7  | 1,28 | 9.11e-06 | PAI-1, Cystatin C, CCL2, IGFBP-3, MMP-2, IGFBP-2, MMP-9                                                               |
| GO:0051384 | Response to glucocorticoid                           | 7  | 1,27 | 1.08e-05 | PAI-1, Adiponectin, CCL2, IL-6, IL-17A, IGFBP-2, CD54                                                                 |
| GO:0046883 | Regulation of hormone secretion                      | 7  | 1,2  | 2.63e-05 | Resistin, Adiponectin, IGFBP-3, CCN3, IL-6, RBP4, Osteopontin                                                         |
| GO:0050727 | Regulation of inflammatory response                  | 7  | 1,15 | 5.11e-05 | PAI-1, Adiponectin, WISP-1, CCN3, IL-6, IL-17A, AHSG                                                                  |
| GO:1901653 | Cellular response to peptide                         | 7  | 1,12 | 7.12e-05 | PAI-1, Adiponectin, CCL2, IL-6, CD106, CD54, AHSG                                                                     |
| GO:0097305 | Response to alcohol                                  | 7  | 1,1  | 9.03e-05 | PAI-1, Adiponectin, CCL2, CD106, RBP4, MMP-9, CD54                                                                    |
| GO:0032103 | Positive regulation of response to external stimulus | 7  | 1,07 | 0.00014  | PAI-1, CCL2, WISP-1, IL-6, IL-17A, MMP-2, NT-3                                                                        |
| GO:0006979 | Response to oxidative stress                         | 7  | 1,03 | 0.00024  | PAI-1, Adiponectin, Cystatin C, IL-6, Lipocalin-2, MMP-2, MMP-9                                                       |
| GO:0034614 | Cellular response to reactive oxygen species         | 6  | 1,41 | 1.54e-05 | PAI-1, Cystatin C, IL-6, Lipocalin-2, MMP-2, MMP-9                                                                    |
| GO:0043200 | Response to amino acid                               | 6  | 1,38 | 2.01e-05 | CCL2, MMP-3, IL-6, IL-17A, MMP-2, CD54                                                                                |
| GO:0060326 | Cell chemotaxis                                      | 6  | 1,33 | 3.50e-05 | CXCL7, CCL2, CCN3, CD106, CCL20, Osteopontin                                                                          |
| GO:0002685 | Regulation of leukocyte migration                    | 6  | 1,28 | 6.36e-05 | PAI-1, CCL2, CCN3, CCL20, MMP-9, CD54                                                                                 |
| GO:0045471 | Response to ethanol                                  | 6  | 1,24 | 9.30e-05 | Adiponectin, CCL2, CD106, RBP4, MMP-9, CD54                                                                           |
| GO:0009743 | Response to carbohydrate                             | 6  | 1,22 | 0.00012  | PAI-1, Adiponectin, Cystatin C, CCL2, CD106, CD54                                                                     |
| GO:0001503 | Ossification                                         | 6  | 1,2  | 0.00015  | WISP-1, IGFBP-3, MMP-2, MMP-9, AHSG, Osteopontin                                                                      |

|            |                                                          |   |      |          |                                                       |
|------------|----------------------------------------------------------|---|------|----------|-------------------------------------------------------|
| GO:0007584 | Response to nutrient                                     | 6 | 1,18 | 0.00019  | Adiponectin, CCL2, CD106, IGFBP-2, MMP-9, Osteopontin |
| GO:0050730 | Regulation of peptidyl-tyrosine phosphorylation          | 6 | 1,18 | 0.00019  | Adiponectin, IL-6, NT-3, CD54, GM-CSF, AHSG           |
| GO:0009612 | Response to mechanical stimulus                          | 6 | 1,16 | 0.00024  | PAI-1, CCL2, IL-6, MMP-2, IGFBP-2, MMP-9              |
| GO:0008406 | Gonad development                                        | 6 | 1,15 | 0.00027  | PAI-1, Cystatin C, RBP4, MMP-2, CD54, AHSG            |
| GO:0071496 | Cellular response to external stimulus                   | 6 | 1,06 | 0.00068  | PAI-1, IL-6, Lipocalin-2, CD106, MMP-9, CD54          |
| GO:0001655 | Urogenital system development                            | 6 | 1,05 | 0.00079  | Adiponectin, RBP4, MMP-2, MMP-9, CD10, Osteopontin    |
| GO:0010712 | Regulation of collagen metabolic process                 | 5 | 1,82 | 2.64e-06 | Resistin, PAI-1, Cystatin C, CCL2, IL-6               |
| GO:0014910 | Regulation of smooth muscle cell migration               | 5 | 1,57 | 2.71e-05 | Resistin, PAI-1, Adiponectin, WISP-1, IGFBP-3         |
| GO:0097530 | Granulocyte migration                                    | 5 | 1,56 | 2.94e-05 | CXCL7, CCL2, IL-17A, CCL20, Osteopontin               |
| GO:0071385 | Cellular response to glucocorticoid stimulus             | 5 | 1,54 | 3.78e-05 | PAI-1, CCL2, IL-6, IL-17A, CD54                       |
| GO:0048661 | Positive regulation of smooth muscle cell proliferation  | 5 | 1,47 | 7.17e-05 | Resistin, WISP-1, IL-6, MMP-2, MMP-9                  |
| GO:0032526 | Response to retinoic acid                                | 5 | 1,41 | 0.00012  | CCL2, RBP4, MMP-2, IGFBP-2, MMP-9                     |
| GO:0002687 | Positive regulation of leukocyte migration               | 5 | 1,37 | 0.00017  | PAI-1, CCL2, CCL20, MMP-9, CD54                       |
| GO:1901655 | Cellular response to ketone                              | 5 | 1,35 | 0.00022  | PAI-1, CCL2, IL-6, CD54, Osteopontin                  |
| GO:0042542 | Response to hydrogen peroxide                            | 5 | 1,33 | 0.00025  | PAI-1, Cystatin C, IL-6, Lipocalin-2, MMP-2           |
| GO:0009749 | Response to glucose                                      | 5 | 1,25 | 0.00053  | PAI-1, Adiponectin, CCL2, CD106, CD54                 |
| GO:0010038 | Response to metal ion                                    | 7 | 1    | 0.00034  | PAI-1, IL-6, CD106, Clusterin, IGFBP-2, MMP-9, CD54   |
| GO:0050731 | Positive regulation of peptidyl-tyrosine phosphorylation | 5 | 1,22 | 0.00073  | Adiponectin, IL-6, NT-3, CD54, GM-CSF                 |
| GO:1903039 | Positive regulation of leukocyte cell-cell adhesion      | 5 | 1,2  | 0.00082  | CCL2, IL-6, CD106, IGFBP-2, CD54                      |
| GO:0031099 | Regeneration                                             | 5 | 1,13 | 0.0017   | PAI-1, CCL2, CCN3, MMP-2, AHSG                        |
| GO:2001234 | Negative regulation of apoptotic signaling pathway       | 5 | 1,13 | 0.0017   | PAI-1, Clusterin, MMP-9, CD54, GM-CSF                 |
| GO:0031668 | Cellular response to extracellular stimulus              | 5 | 1,11 | 0.0020   | IL-6, Lipocalin-2, CD106, MMP-9, CD54                 |
| GO:0010951 | Negative regulation of endopeptidase activity            | 5 | 1,09 | 0.0024   | PAI-1, Cystatin C, IL-6, MMP-9, AHSG                  |
| GO:0031349 | Positive regulation of defense response                  | 5 | 1,09 | 0.0024   | PAI-1, WISP-1, IL-6, IL-17A, MMP-2                    |

|            |                                               |   |      |        |                                               |
|------------|-----------------------------------------------|---|------|--------|-----------------------------------------------|
| GO:0030336 | Negative regulation of cell migration         | 5 | 1,08 | 0.0026 | PAI-1, Adiponectin, CCL2, IGFBP-3, CCN3       |
| GO:0071375 | Cellular response to peptide hormone stimulus | 5 | 1,08 | 0.0026 | PAI-1, Adiponectin, CCL2, IL-6, AHSG          |
| GO:1902105 | Regulation of leukocyte differentiation       | 5 | 1,05 | 0.0033 | Adiponectin, IL-6, IL-17A, GM-CSF, FLT3LG     |
| GO:0051251 | Positive regulation of lymphocyte activation  | 5 | 1,05 | 0.0036 | CCL2, IL-6, CD106, IGFBP-2, FLT3LG            |
| GO:0070372 | Regulation of erk1 and erk2 cascade           | 5 | 1,02 | 0.0043 | Adiponectin, CCL2, IL-6, CCL20, CD54          |
| GO:0072001 | Renal system development                      | 5 | 1,02 | 0.0043 | Adiponectin, RBP4, MMP-9, CD10, Osteopontin   |
| GO:0022407 | Regulation of cell-cell adhesion              | 6 | 1    | 0.0014 | Adiponectin, CCL2, IL-6, CD106, IGFBP-2, CD54 |



**Supplemental Table S5.** Sequence of all primers used for real-time PCR.

| <b>Rat Primer name</b>       | <b>Sequence</b>             |
|------------------------------|-----------------------------|
| <b><i>COL1A1</i> Forward</b> | CTGACGCATGGCCAAGAAGA        |
| <b><i>COL1A1</i> Reverse</b> | CCGTGCCATTGTGGCAGATA        |
| <b><i>GATA4</i> Forward</b>  | ATCTCACTATGGGCACAGCAG       |
| <b><i>GATA4</i> Reverse</b>  | ACTGGATGGATGGAGGACCC        |
| <b><i>TGFB1</i> Forward</b>  | TCCATGACATGAACCGACCC        |
| <b><i>TGFB1</i> Reverse</b>  | TGCCGTACACAGCAGTTCTT        |
| <b><i>TUB1A1</i> Forward</b> | GCTGTAAGAAGCAACACCTCC       |
| <b><i>TUB1A1</i> Reverse</b> | CCGACGTGGATGGAGATACA        |
| <b><i>YAP</i> Forward</b>    | AGGGCCTCTTCCTGATGGAT        |
| <b><i>YAP</i> Reverse</b>    | GTGATCCTCTGGTTCATGGCA       |
| <b><i>ANKDR1</i> Forward</b> | CTTGGCGATCGTGGAGAAGT        |
| <b><i>ANKDR1</i> Reverse</b> | CCAGTGGATGGCTGTGGATT        |
| <b><i>ACTA2</i> Forward</b>  | CATCACCAACTGGGACGACA        |
| <b><i>ACTA2</i> Reverse</b>  | TCCGTTAGCAAGGTCGGATG        |
| <b><i>CTGF</i> Forward</b>   | ACCCAACTATGATGCGAGCC        |
| <b><i>CTGF</i> Reverse</b>   | CATTGGTAACCCGGGTGGAG        |
| <b><i>CYR61</i> Forward</b>  | AGTTCCACCGCTCTGAAAGG        |
| <b><i>CYR61</i> Reverse</b>  | AAGCTCTCCCCGTTCTGGTA        |
| <b>Human Primer name</b>     | <b>Sequence</b>             |
| <b><i>CCL2</i> Forward</b>   | AGA GGC TGA GAC TAA CCC AGA |
| <b><i>CCL2</i> Reverse</b>   | TTT CAT GCT GGA GGC GAG AG  |
| <b><i>IL6</i> Forward</b>    | AGT GAG GAA CAA GCC AGA GC  |
| <b><i>IL6</i> Reverse</b>    | ATT TGT GGT TGG GTC AGG GG  |
| <b><i>IL8</i> Forward</b>    | TGTACTCATGACCAGAAAGACC      |
| <b><i>IL8</i> Reverse</b>    | GGACACTACTGGGAGTGACAA       |
| <b><i>GAPDH</i> Forward</b>  | ATCAGCAATGCCTCCTGCAC        |
| <b><i>GAPDH</i> Reverse</b>  | TGGCATGGACTGTGGTCATG        |

**Supplemental Figure S1.** Quantification by flow cytometry of the CD45+ cell fraction in all samples, confirming their non-hematopoietic nature at the 6- **(a)** and 12-week **(b)** follow-up.

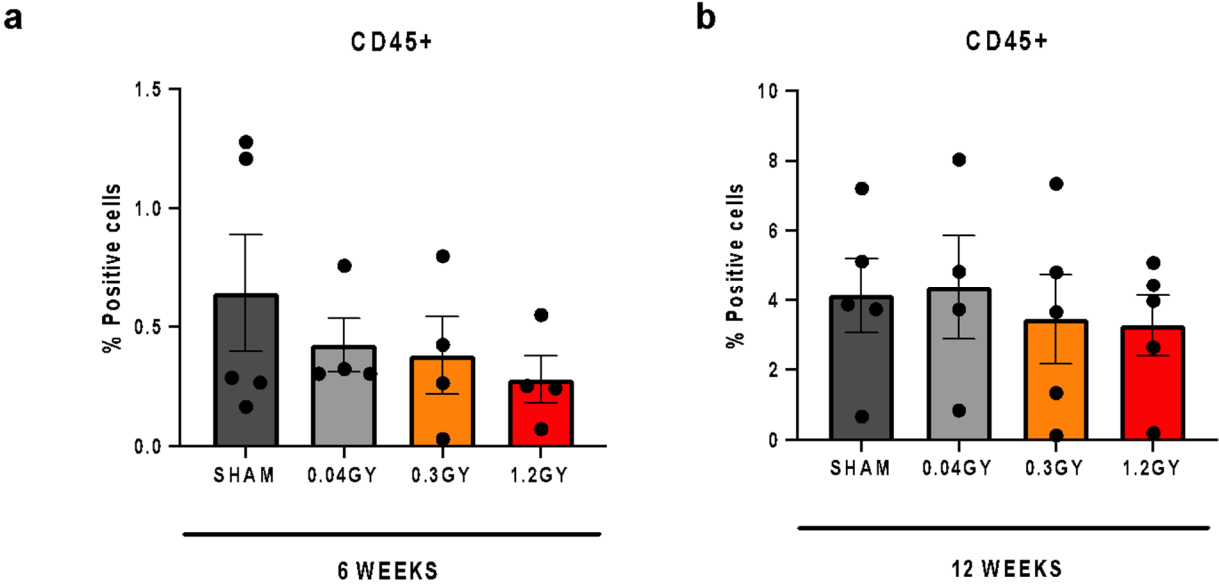

**Supplemental Figure S2.** Alamarblue cell proliferation assay was performed on cells isolated from all dose groups at both 6 (A) and 12-week follow-up (B). N=5. Quantification of the spheroid size in terms of average spheroid area calculation from random images, at the 6 (C) and 12-week follow-up (D). N>=4 per condition.

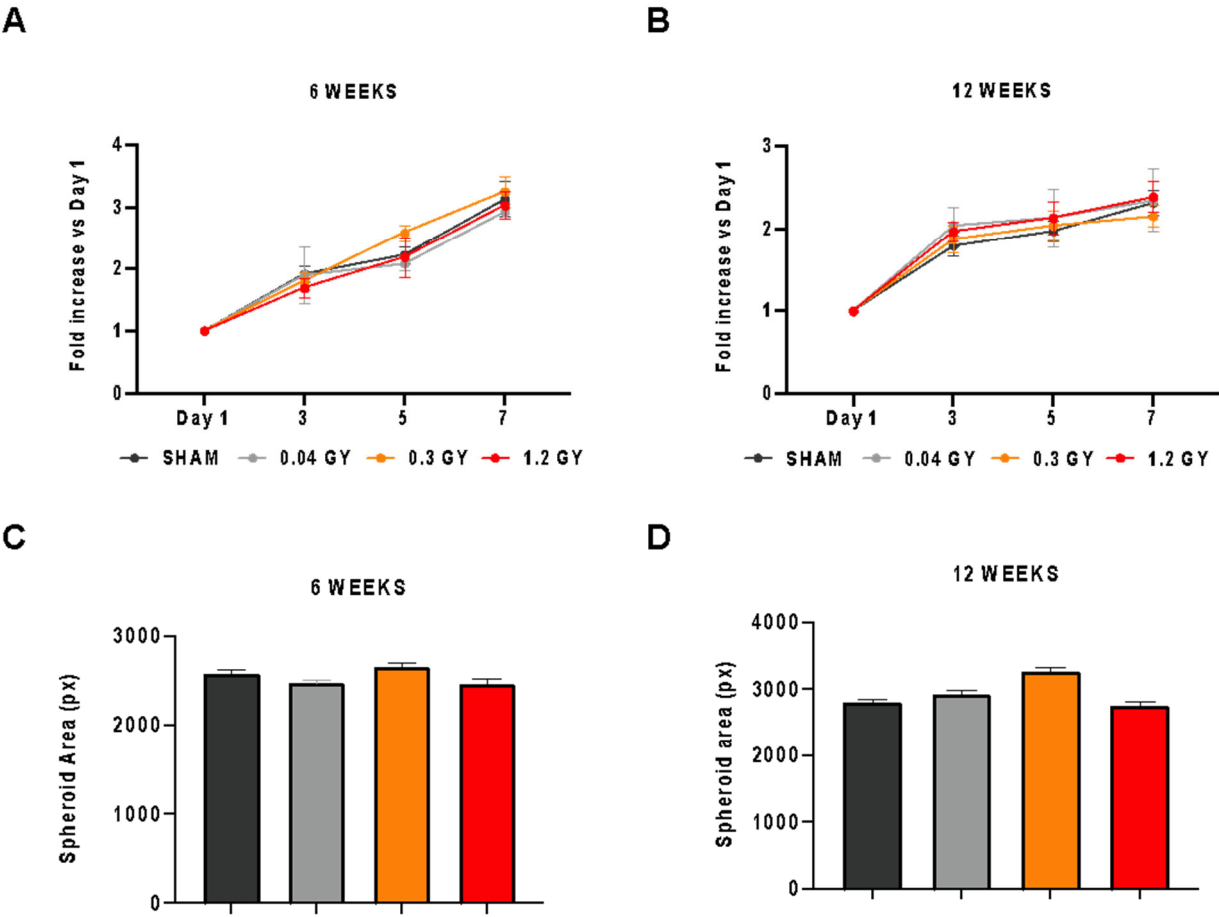

**Supplemental Figure S3.** Representative microscopy images, with corresponding binary masks created by the ImageJ analysis macro, of the migration assay 0 and 14 hours after creation of the scratch.

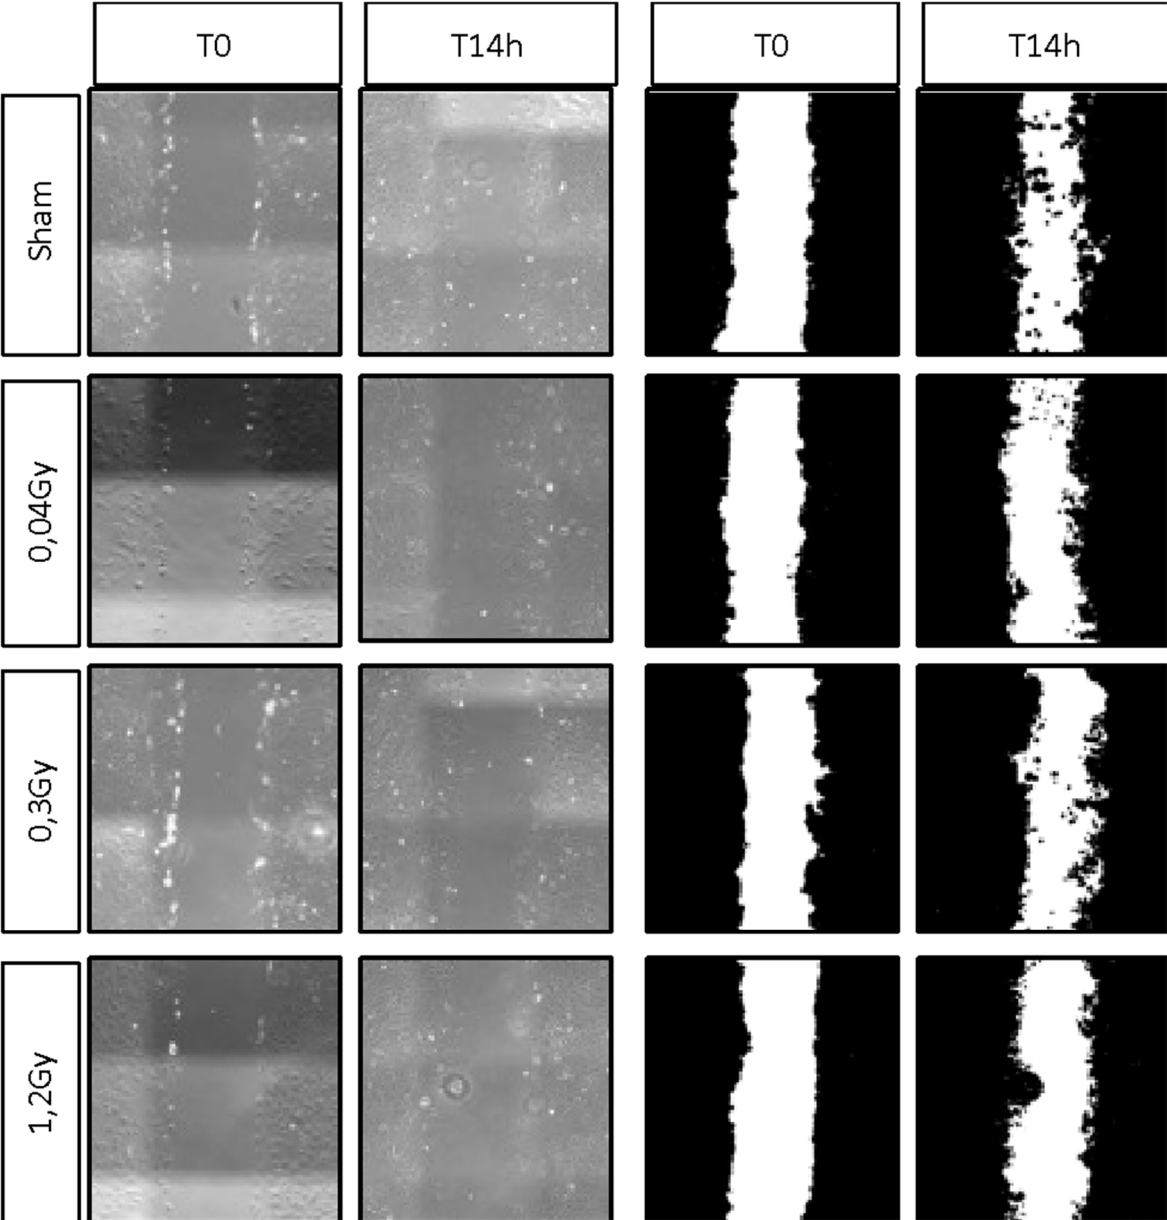

**Supplemental Figure S4.** Principal component analysis of transcriptomic data obtained from RNA-seq of whole ventricular tissue from all treatment groups at the two follow-up times of 6 and 12 weeks after the end of radiation.

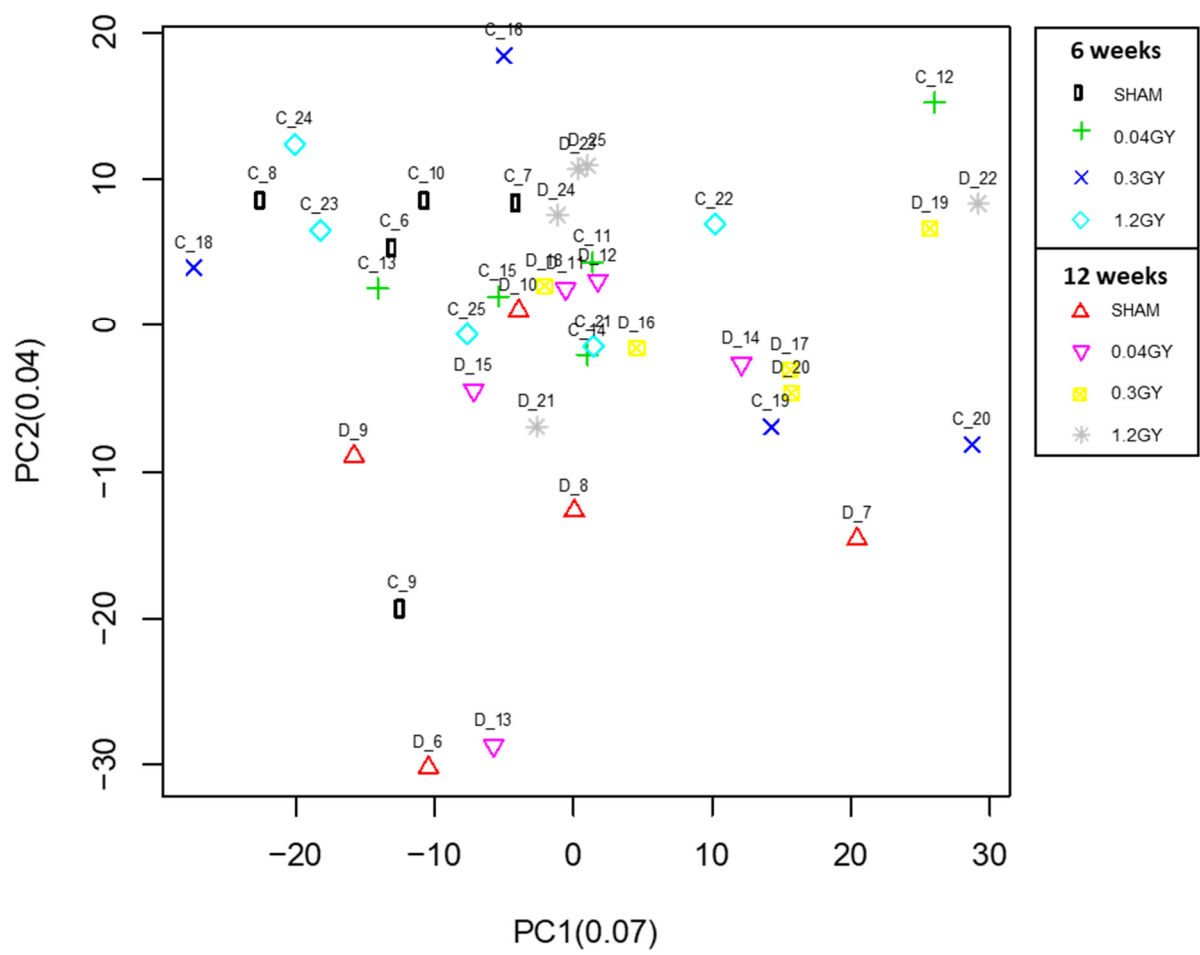

**Supplemental Figure S5.** Gene expression levels validated by qRT-PCR of selected RNA-seq hits from the transcriptomic data reported in figures 3 and 4. \*  $p<0.05$ . \*\*  $p<0.01$ .

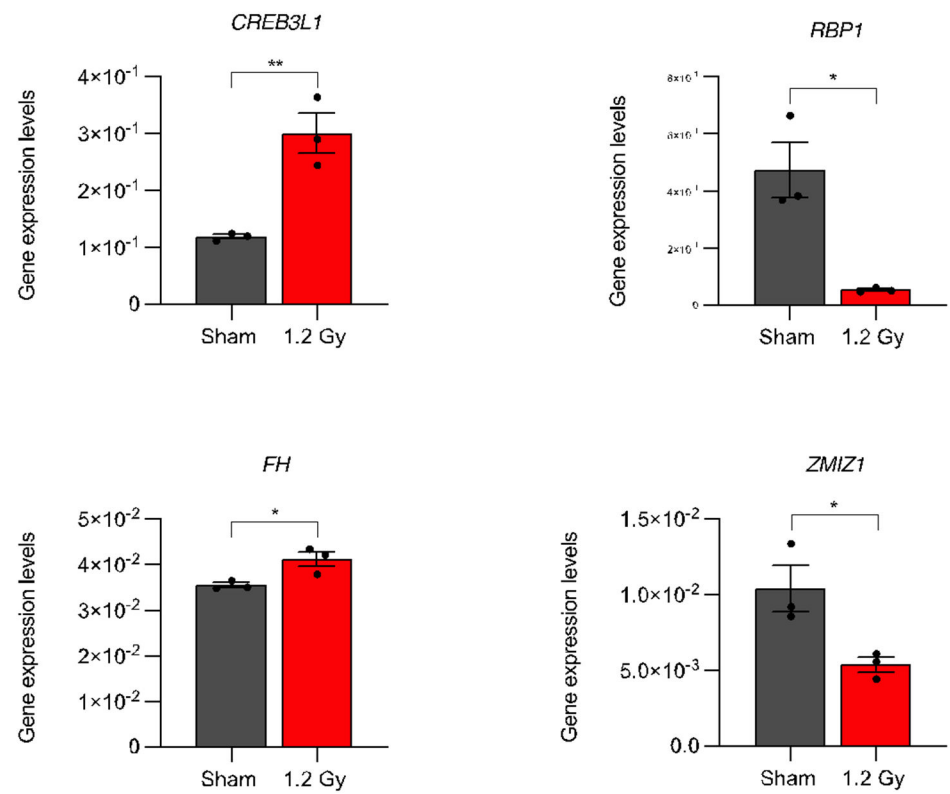

**Supplemental Figure S6.** Quantification of soluble collagen concentration by Sirius Red assay, released in conditioned media by CMSCs of the 12 follow-up after 24h **(a)** Quantification of the percentage of alpha smooth muscle actin (aSMA)-positive cells **(b)** from the 12-week follow-up groups, when cultured on substrates with different stiffness (1MPa, 100kPa, 20kPa). Representative immunofluorescence images **(c)** and corresponding quantification of the cytoplasm-to-nucleus YAP expression ratio **(d)** for CMSCs from the 12-week follow-up. Normalized gene expression levels **(e)** of the YAP-target genes *ACTA2*, *ANKDR1*, *CTGF*, *CYR61* in CMSCs from different irradiation groups (12-week follow-up), in relation to differential substrate stiffness values.

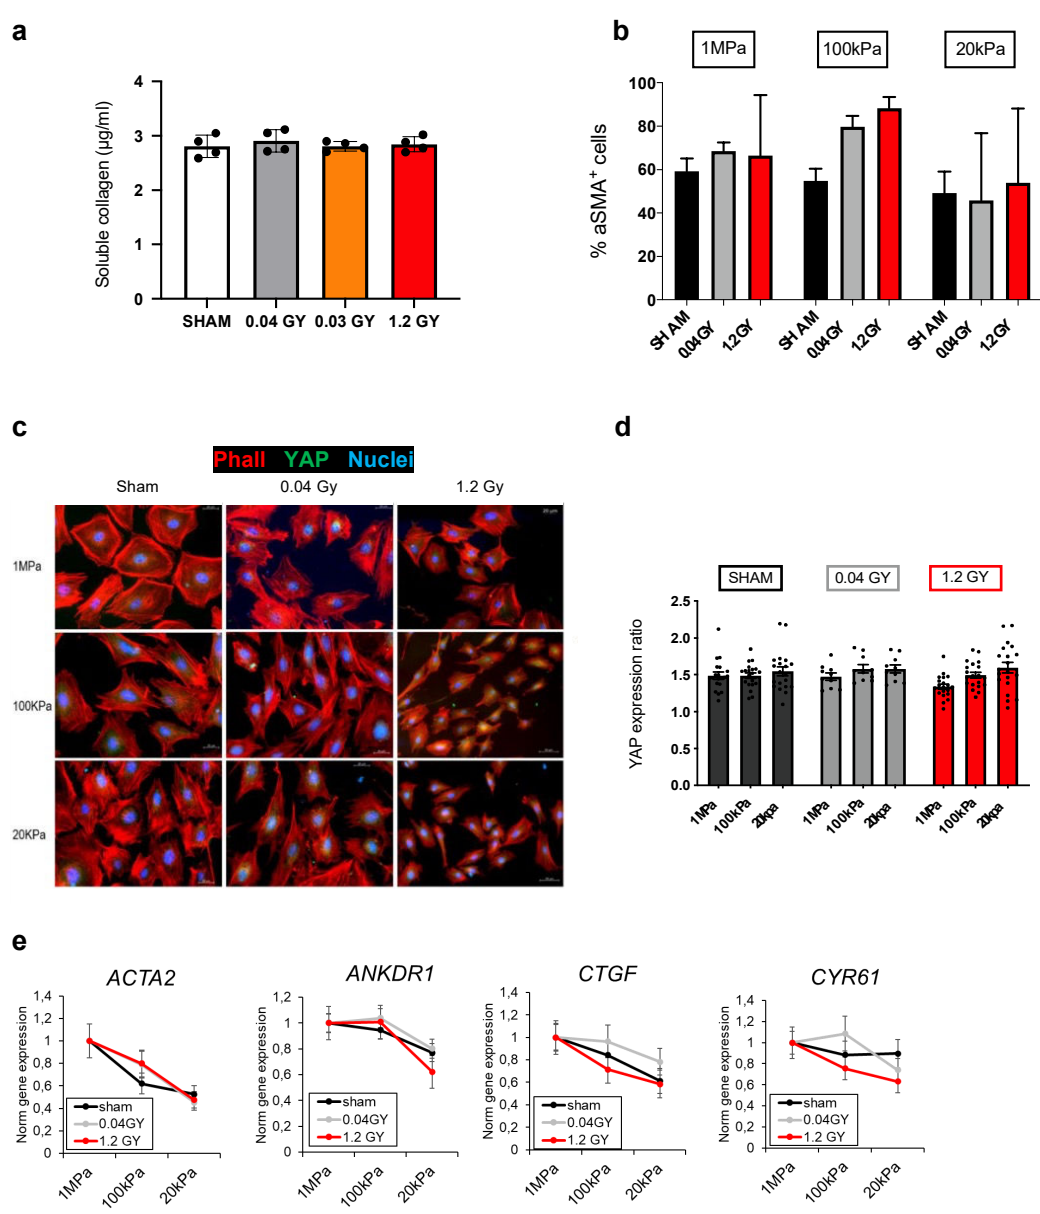

**Supplemental Figure S7.** STRING association networks of the highly modulated cytokines with the superimposition of a selection of GO terms of interest, related to cell migration, inflammation, aging, or radiation.

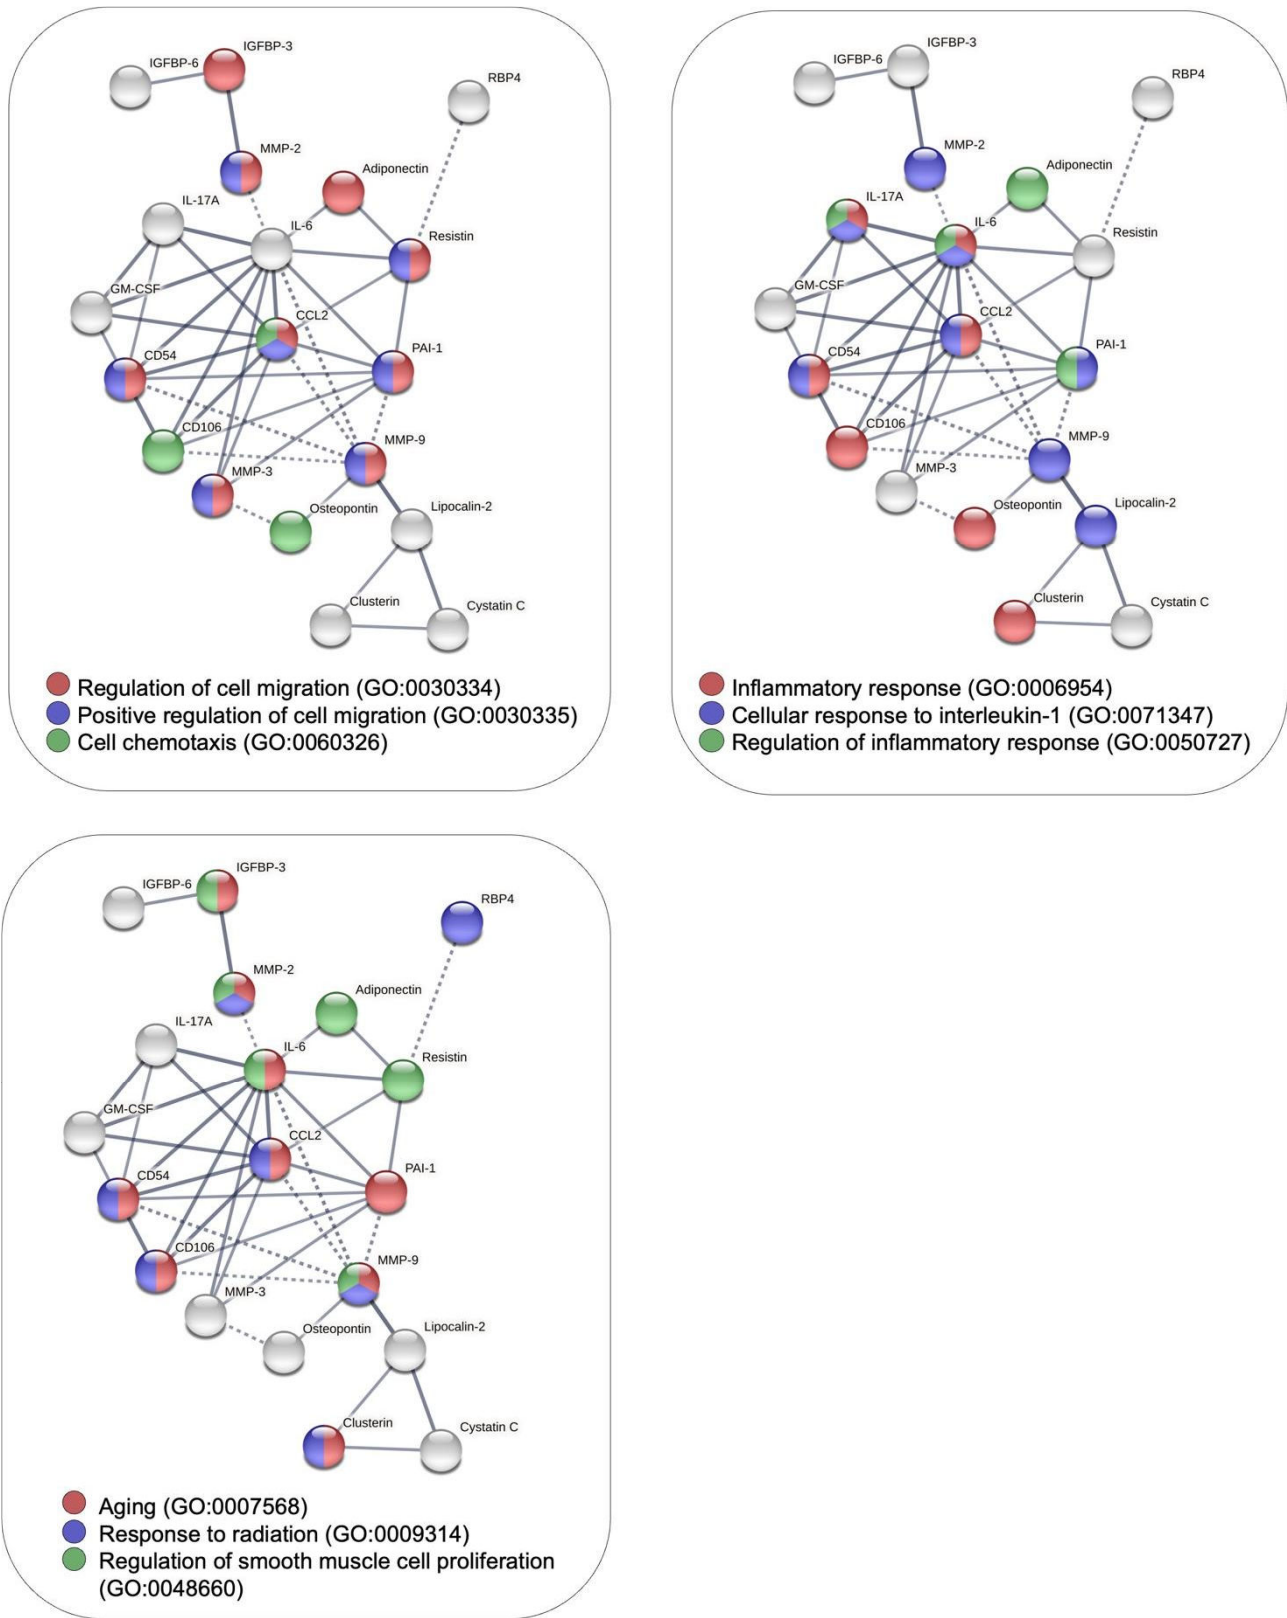

Supplement: s1 [file s1]
